# Supplementary material
Source: PubMed Central journal article supplement (PMC9271537)
Supplement: NIHMS1774119-supplement-3.pdf [file NIHMS1774119-supplement-3.pdf]

**A** Sensitization: Vehicle or DNCB (topical)  $\pm$  NK1R antagonist (i.d.)

Elicitation: DNCB (topical)

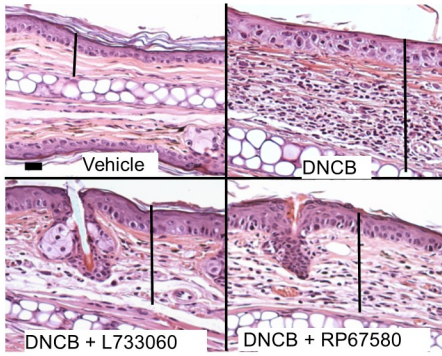

Sensitization: MNA

Elicitation: DNCB (topical)

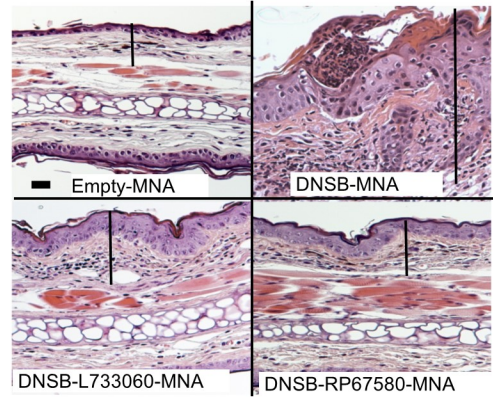

**B**

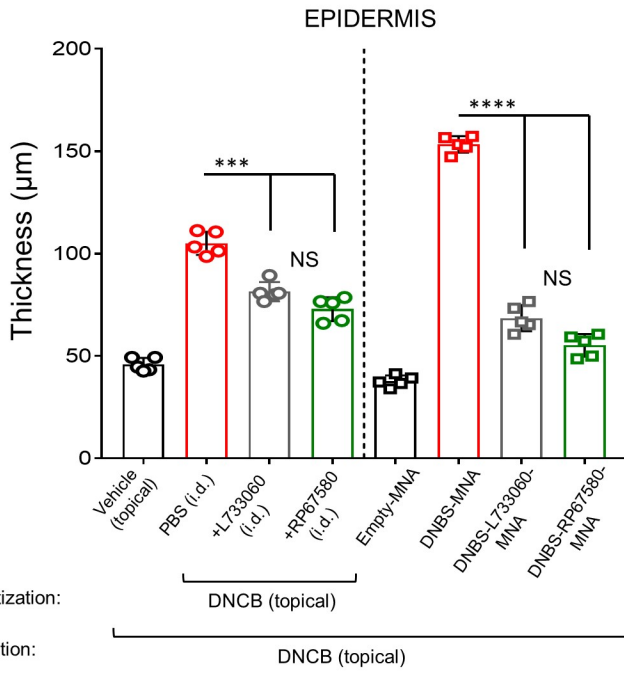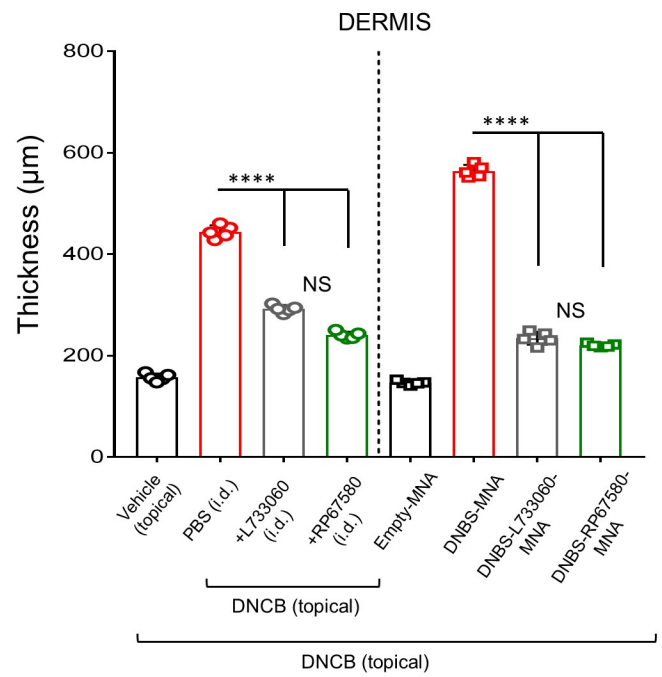

**C**

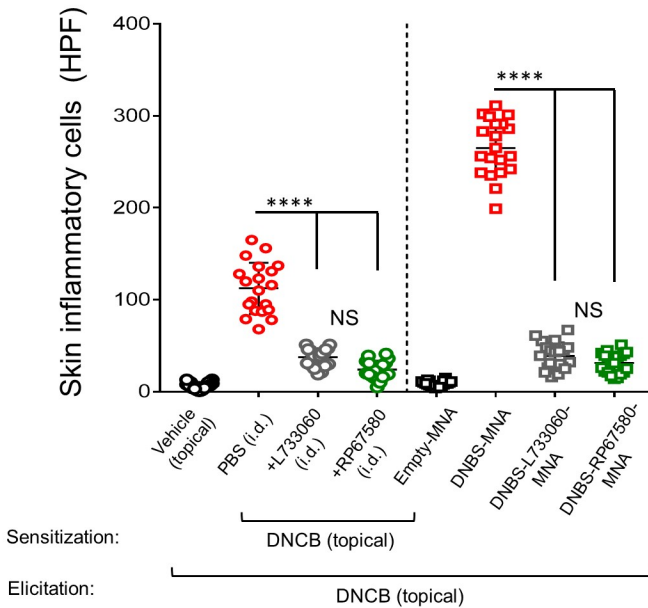

**Fig. E3**
