# Supplementary material
Source: PubMed Central journal article supplement (PMC9271537)
Supplement: NIHMS1774119-supplement-7.pdf [file NIHMS1774119-supplement-7.pdf]

**A**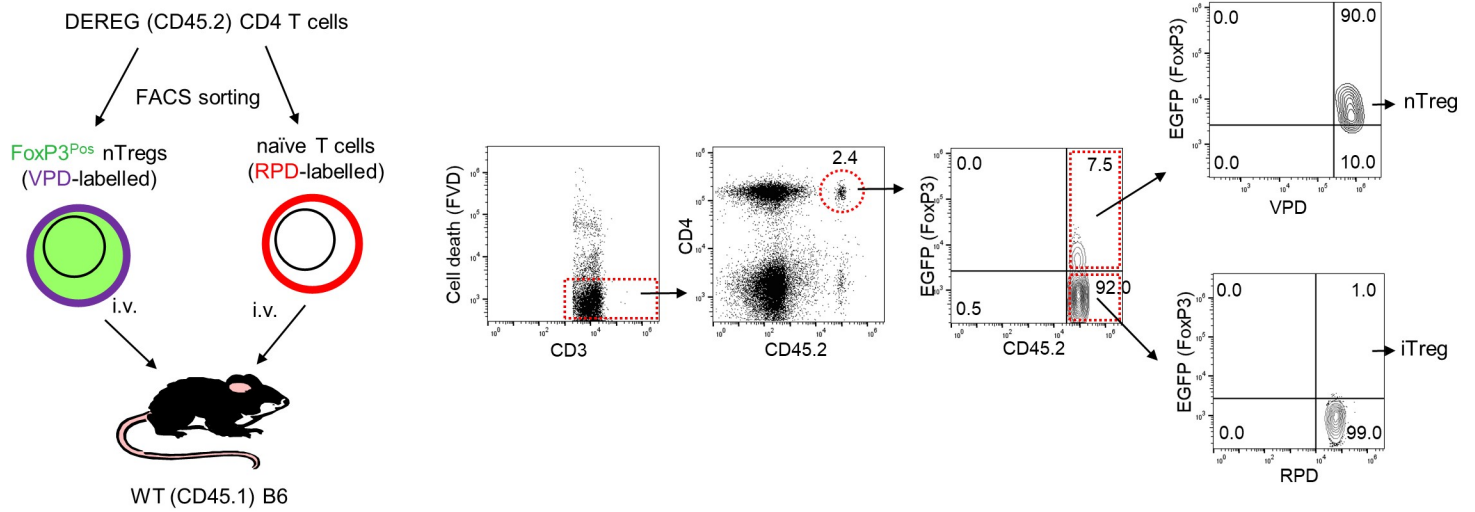**B**

Skin-draining (auricular) lymph nodes

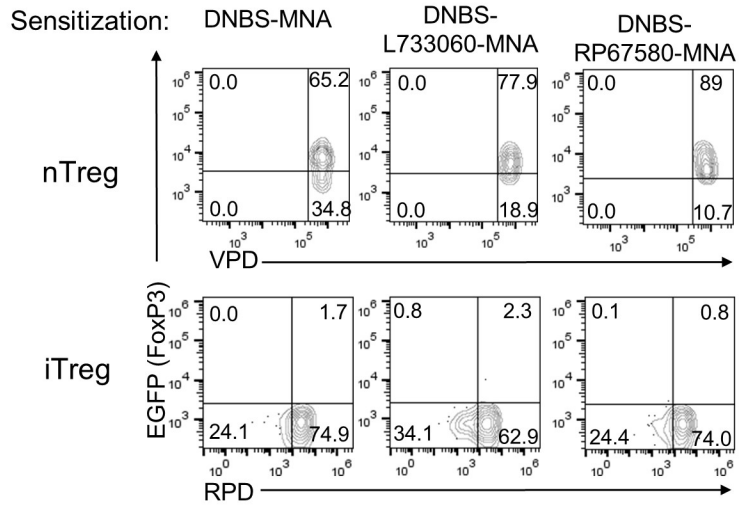**C**

Elicitation sites (ear skin)

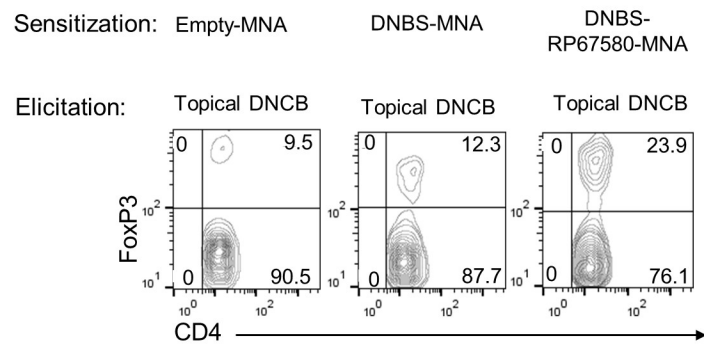**D**

Elicitation sites (ear skin)

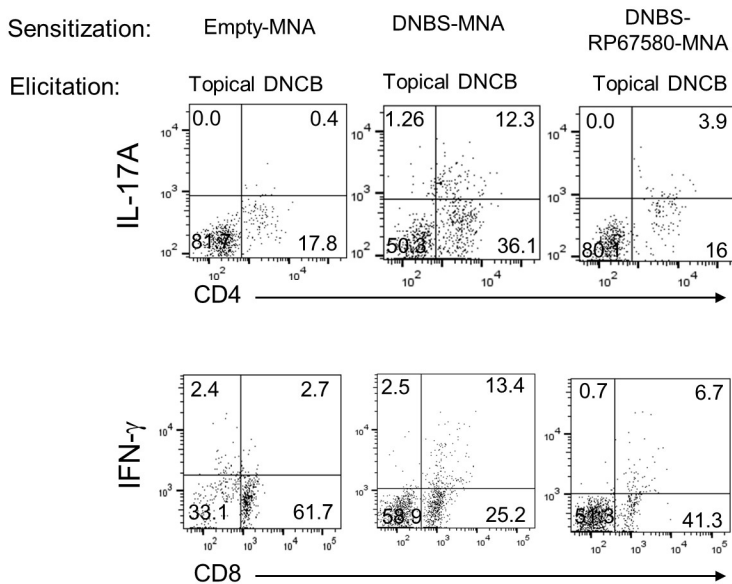**Fig. E7**
