# Supplementary material
Source: PubMed Central journal article supplement (PMC9271537)

**A****Epidermis****Dermis****B**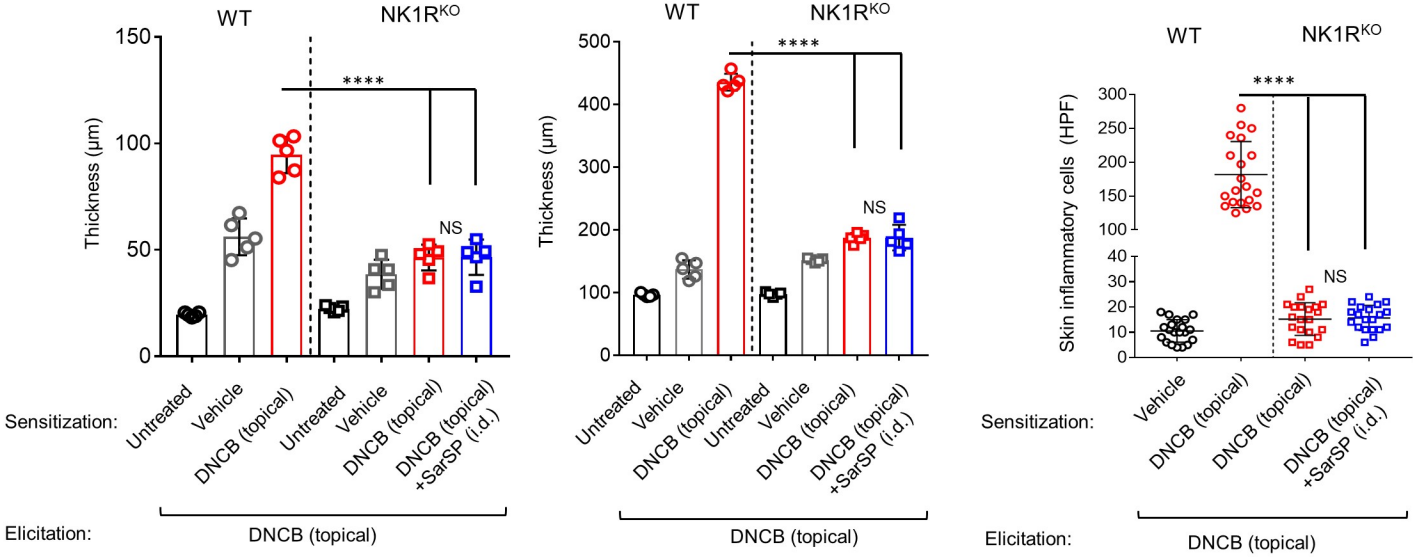**C**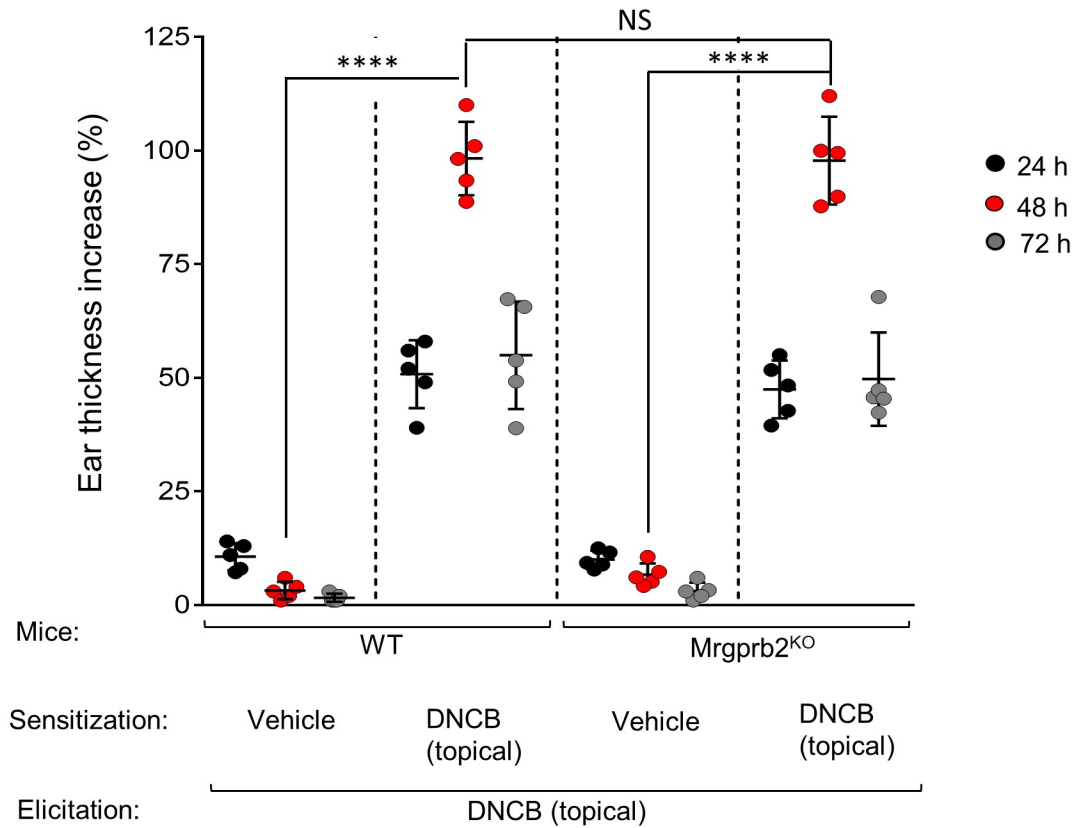

Supplement: NIHMS1774119-supplement-1.pdf [file NIHMS1774119-supplement-1.pdf]

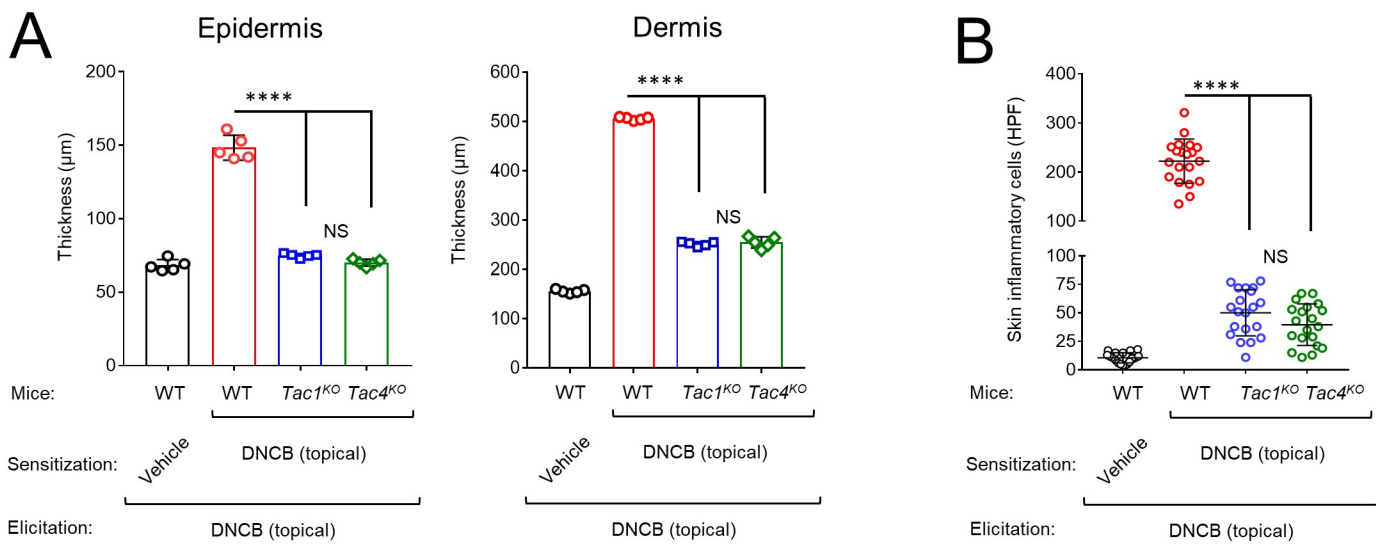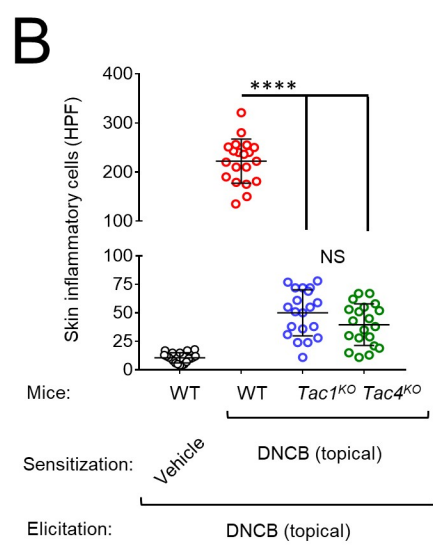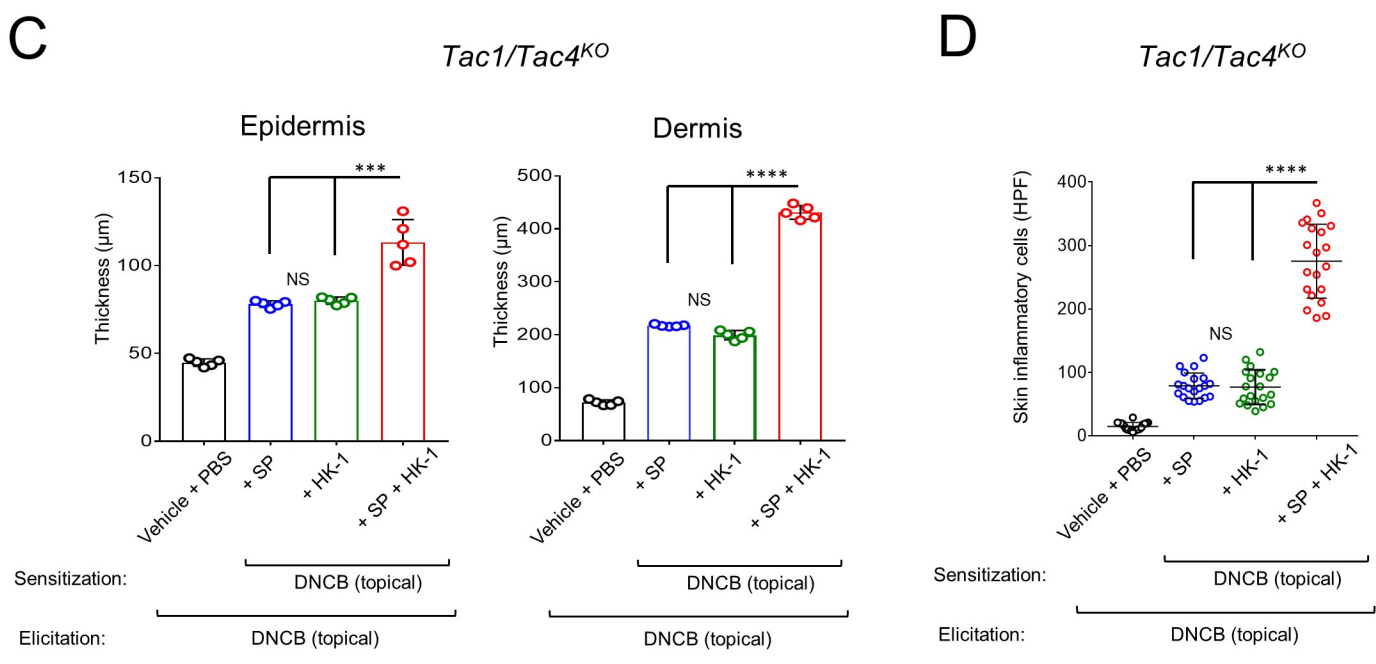

**Fig. E2**

Supplement: NIHMS1774119-supplement-2.pdf [file NIHMS1774119-supplement-2.pdf]

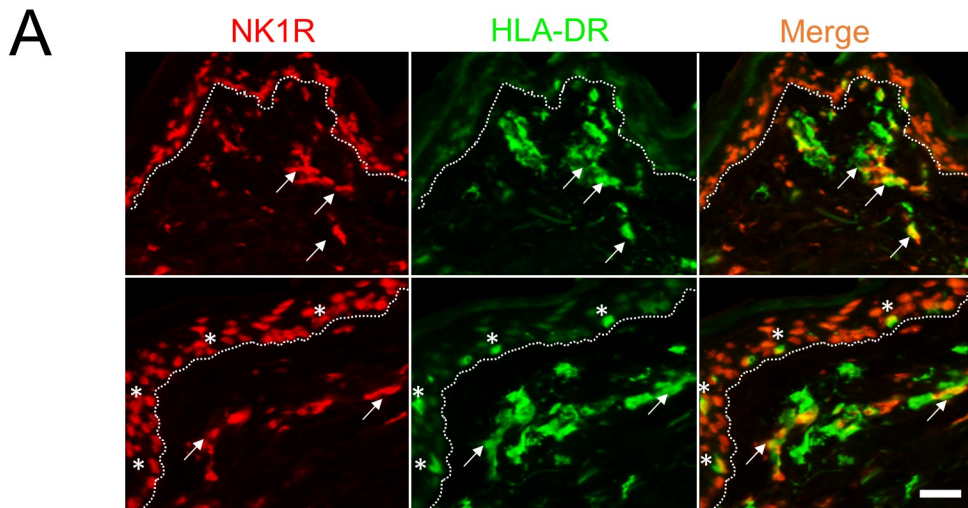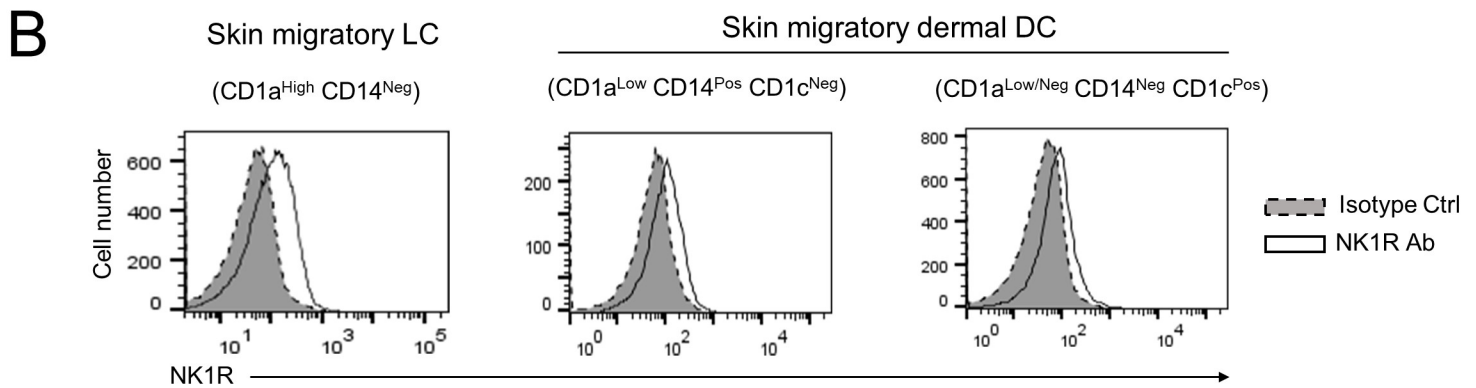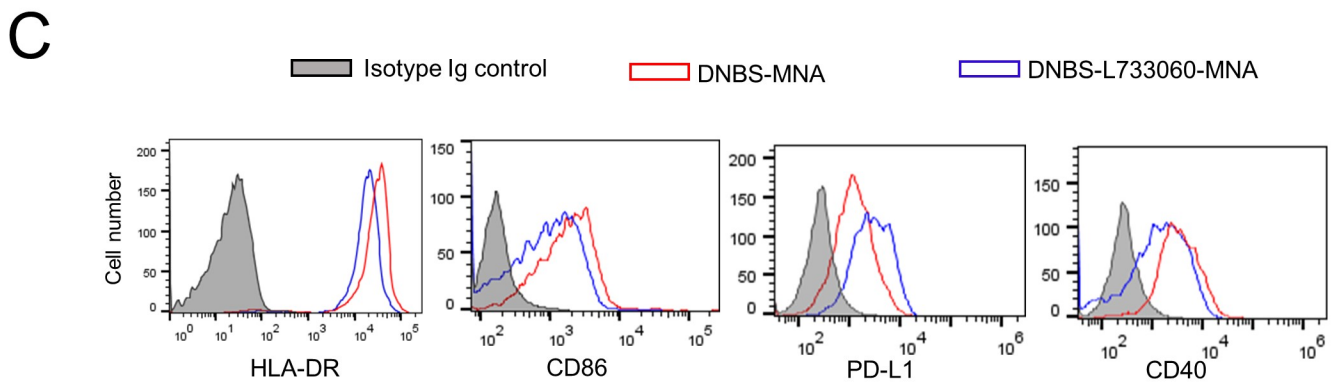

Fig. E4

Supplement: NIHMS1774119-supplement-4.pdf [file NIHMS1774119-supplement-4.pdf]

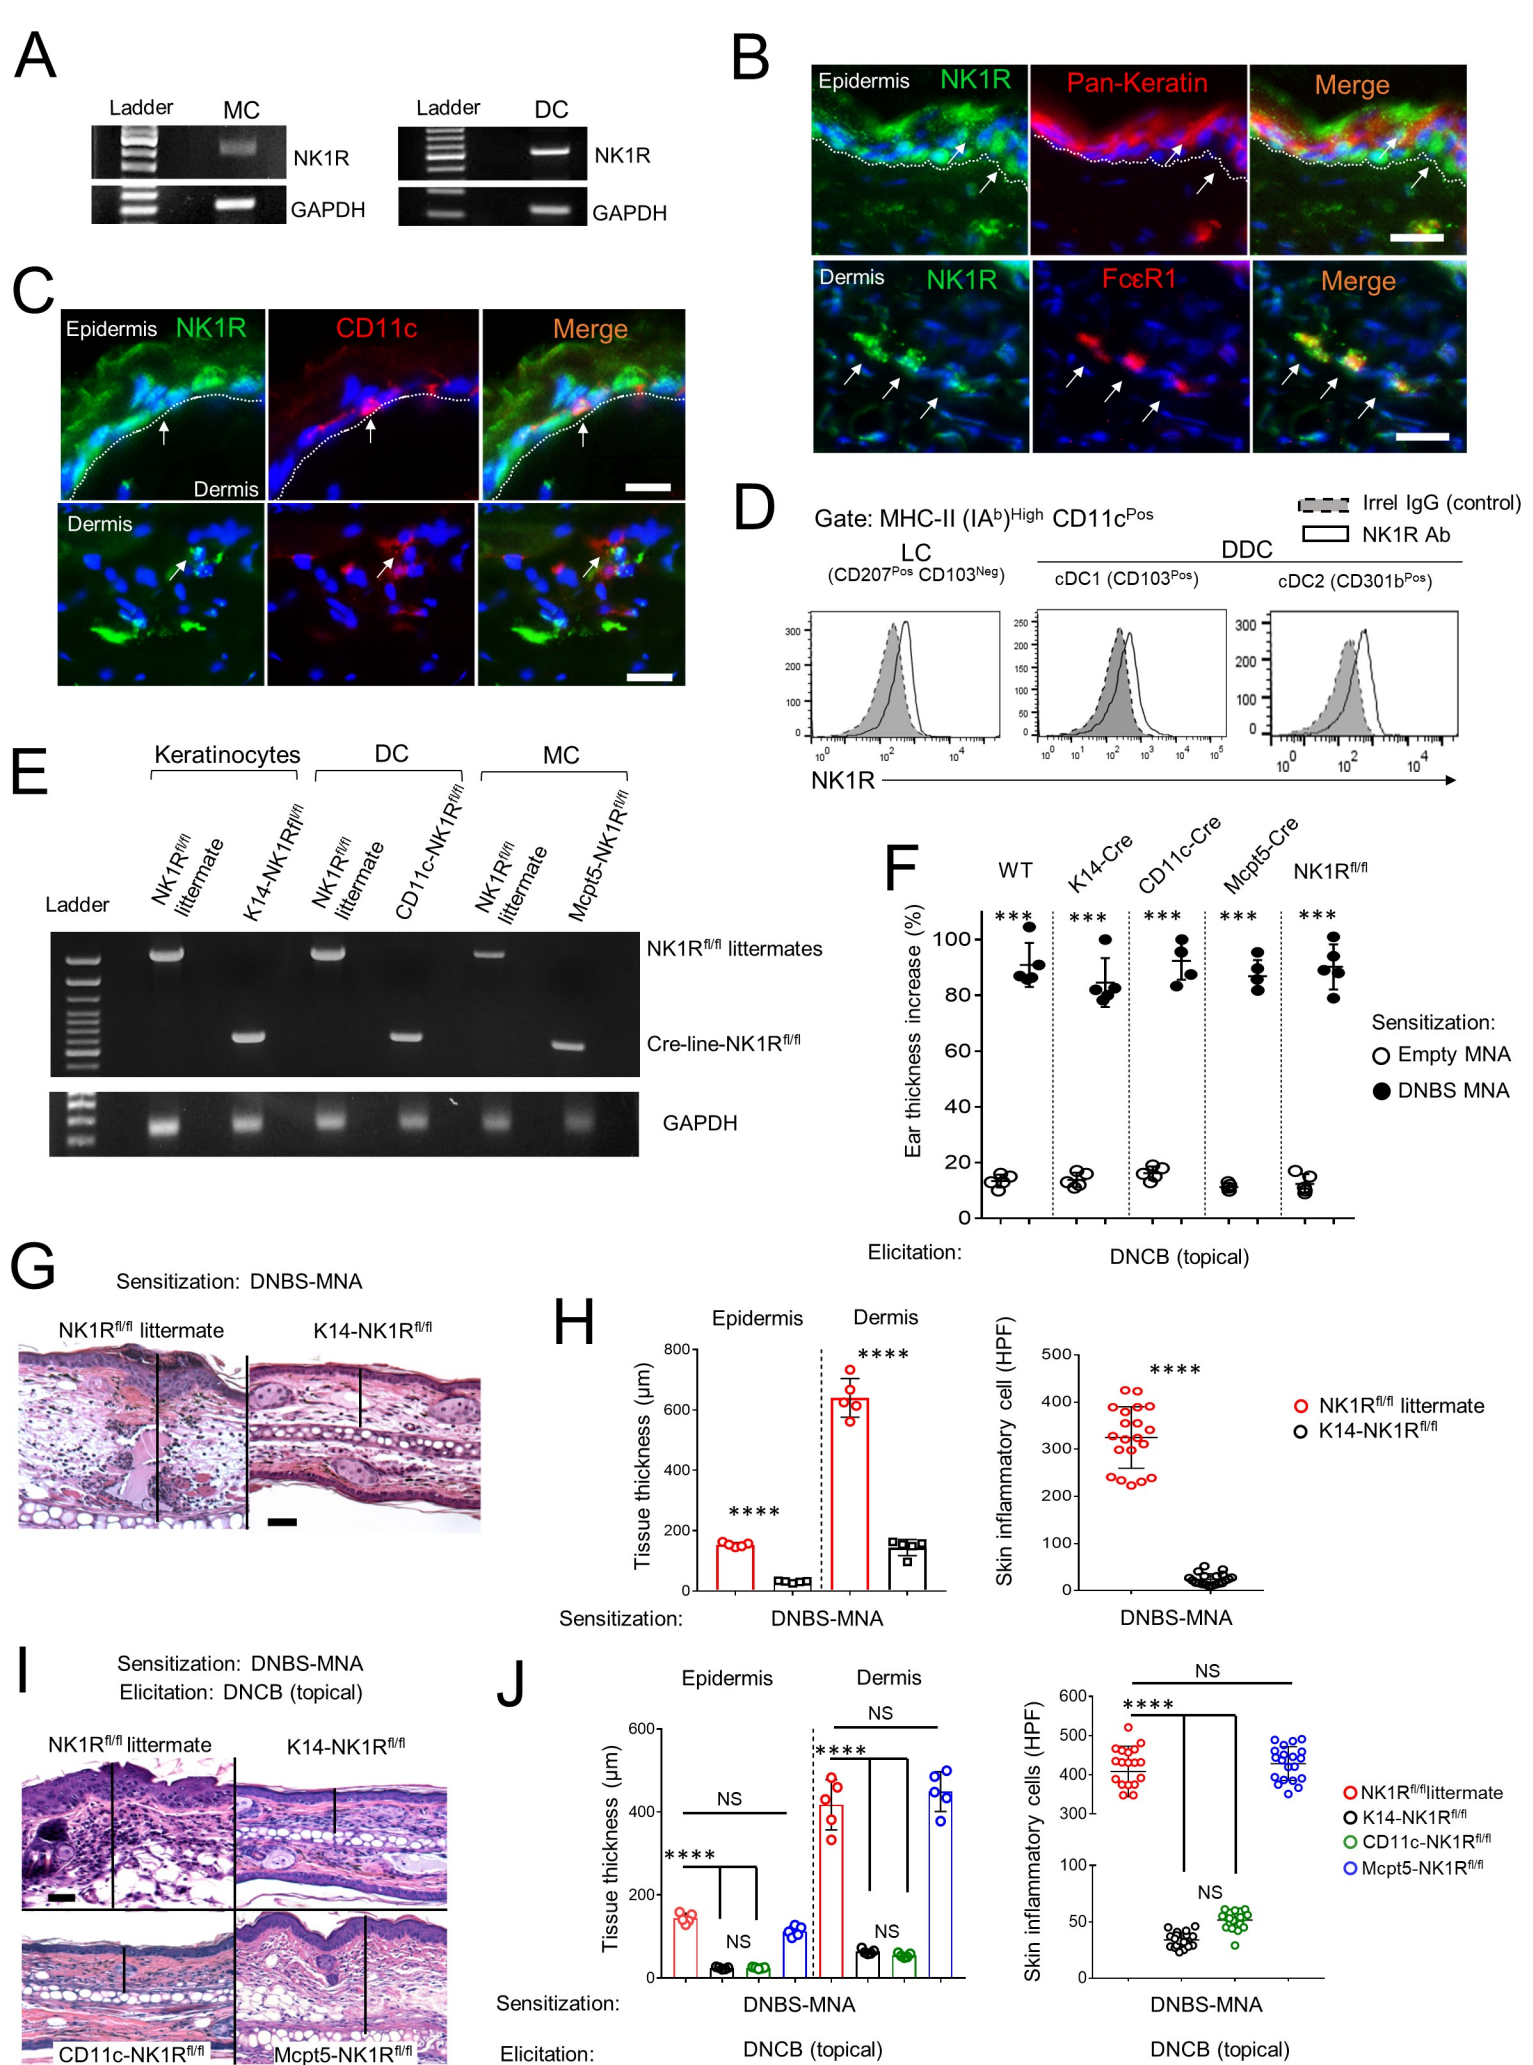

**Fig. E5**

Supplement: NIHMS1774119-supplement-5.pdf [file NIHMS1774119-supplement-5.pdf]

**A**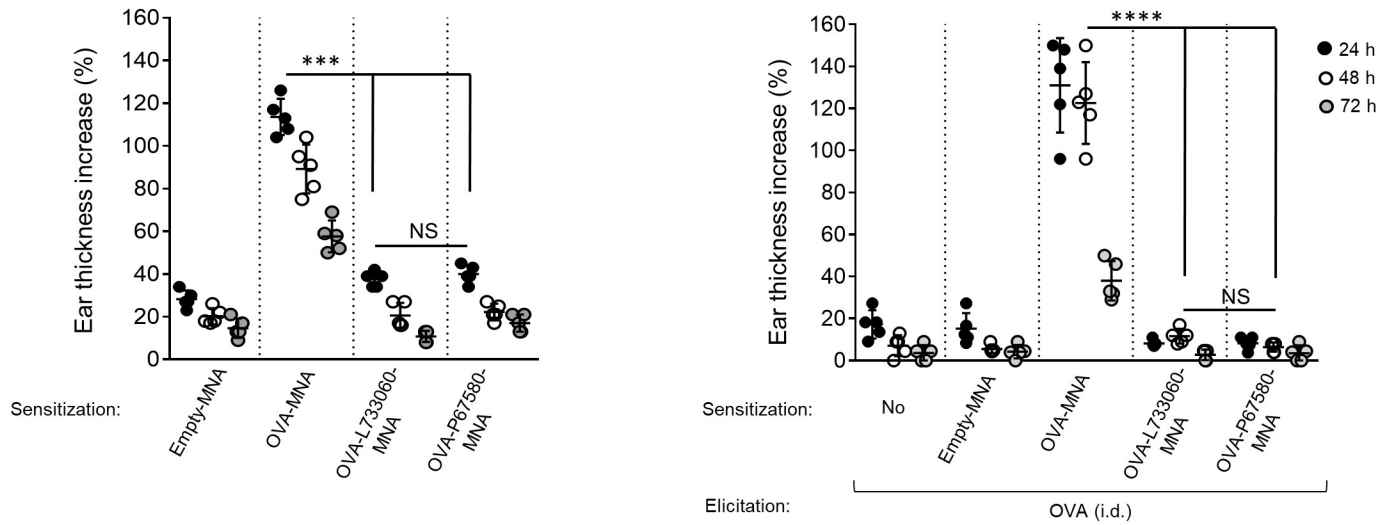**B**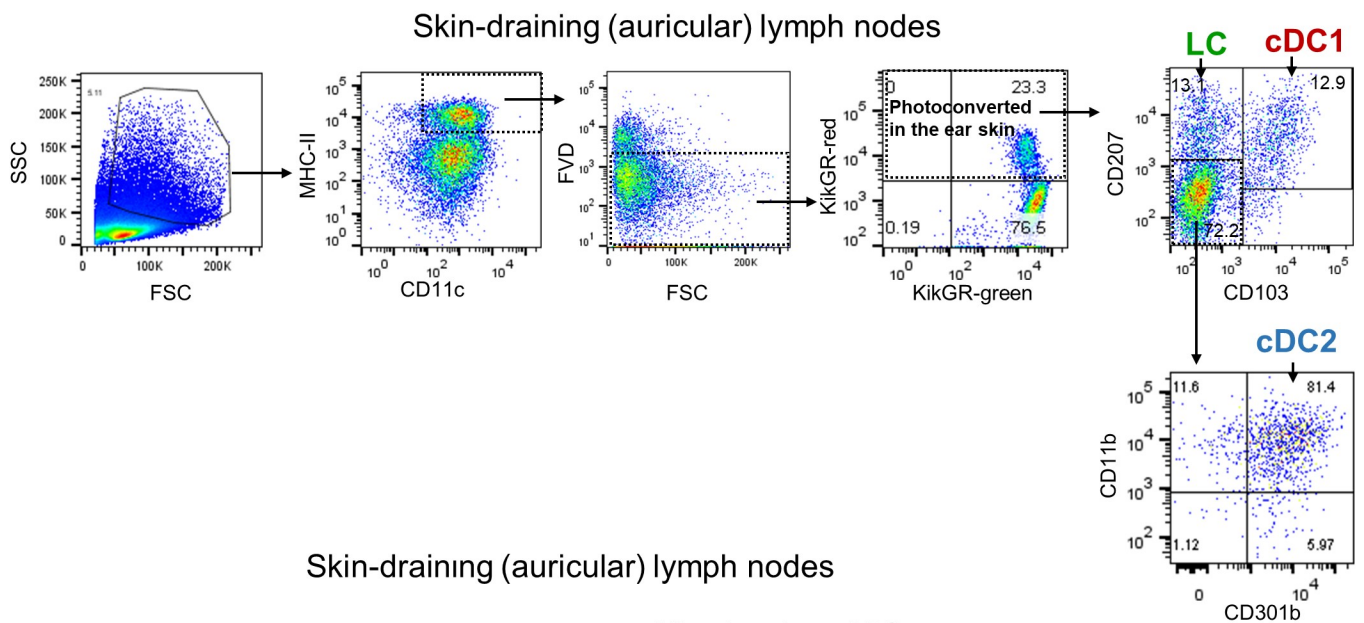**C**

Skin-draining (auricular) lymph nodes

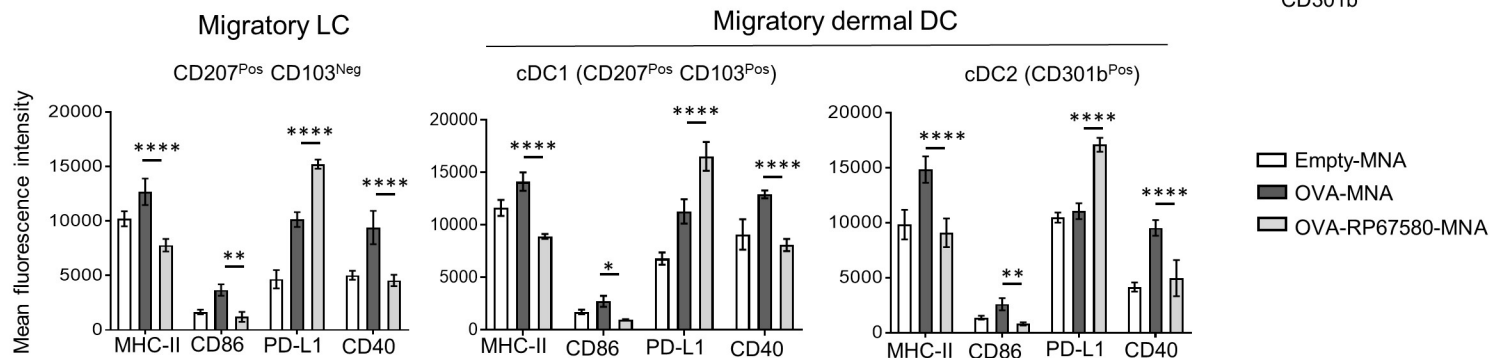**D**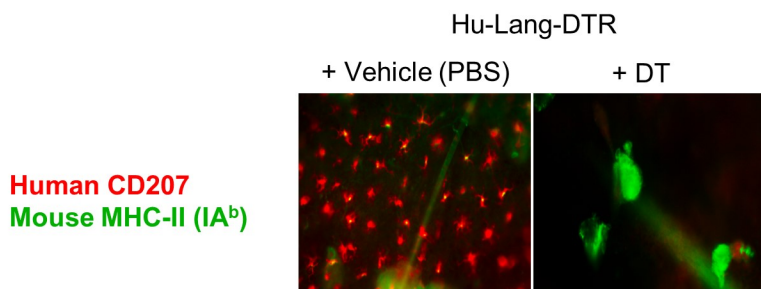

Fig. E6

Supplement: NIHMS1774119-supplement-6.pdf [file NIHMS1774119-supplement-6.pdf]

**A**

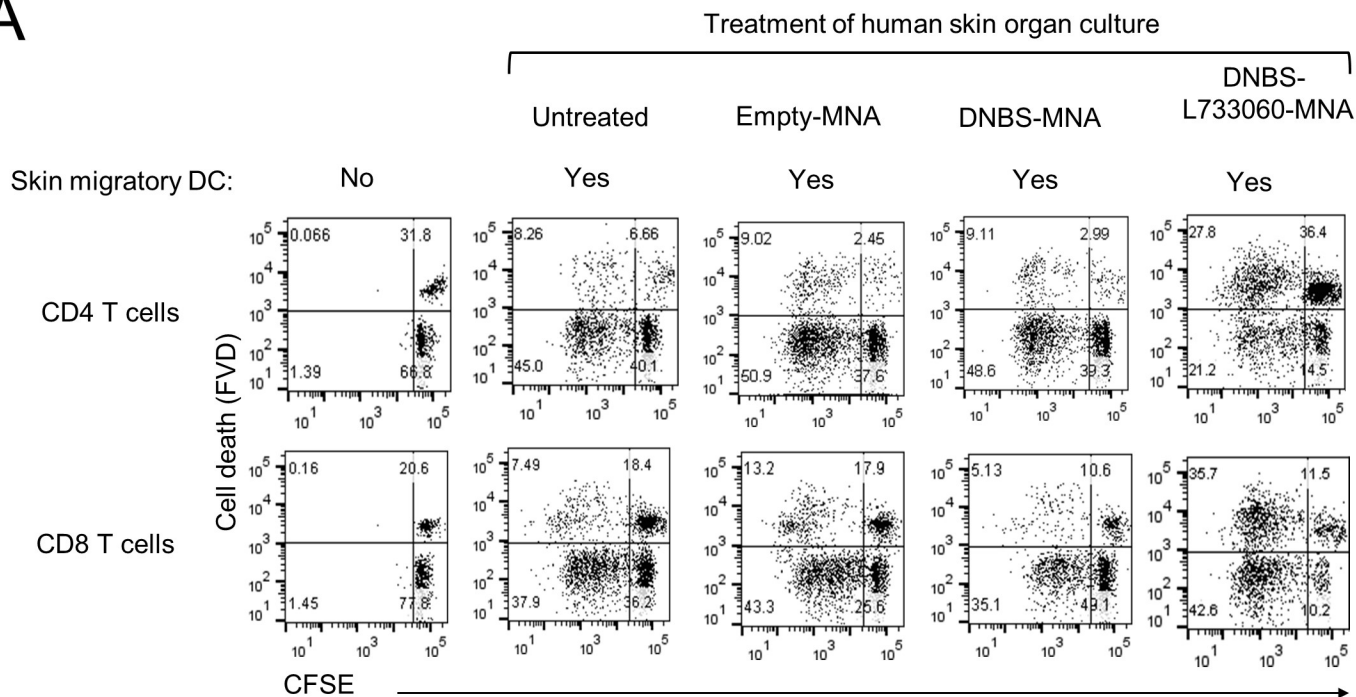

**B**

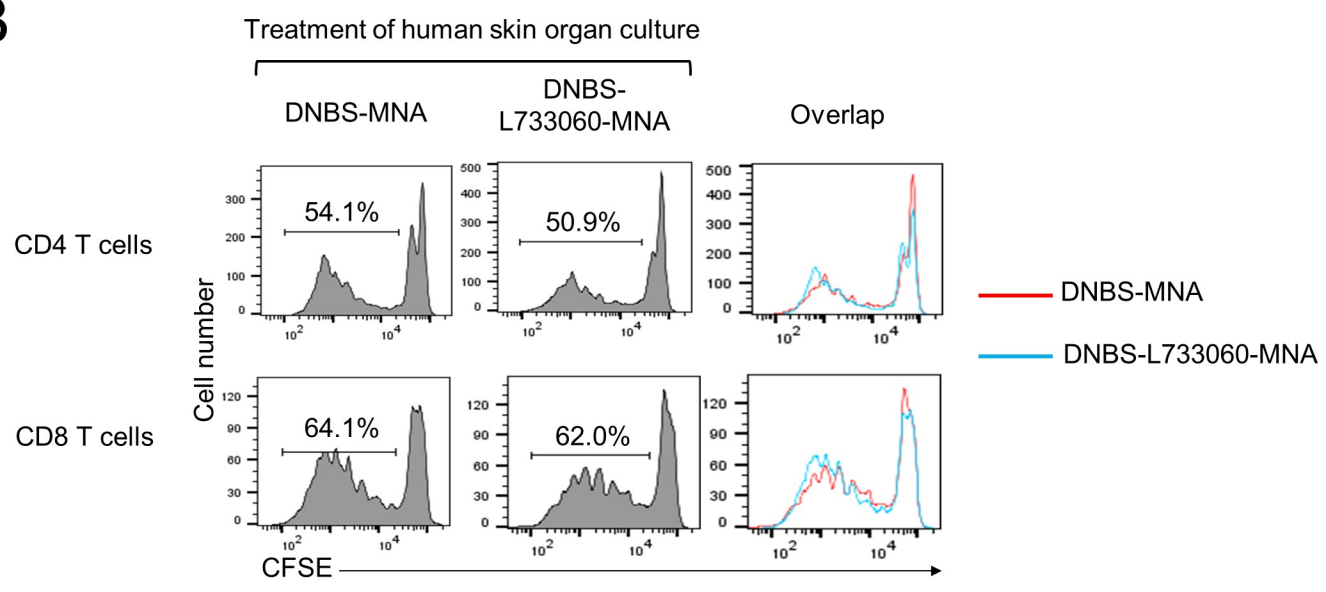

**Fig. E8**

Supplement: NIHMS1774119-supplement-8.pdf [file NIHMS1774119-supplement-8.pdf]
